# Supplementary material for: Harmonizing Global Insolvency Proceedings from Theory to Practice: A Comparative Analysis of Centre of Main Interest (COMI) Determination and Judicial Trends
Source: Research Square preprint supplement (doi:10.21203/rs.3.rs-7019440/v1), 2025-12-14
Supplement: Supplementary file 1 [file 88a7624aa8fb23ee3b305766.docx]

**Appendix**

| S. No. | Case Name | Year | Country | Registered Office | Actual Business Office | COMI dispute (Yes/No) | COMI Shifted Case (Yes/No) | Time Taken to complete the proceedings (Months) |
| --- | --- | --- | --- | --- | --- | --- | --- | --- |
| **1** | **European Union**  Eurofood IFSC Ltd: Case C-341/04, [2006] ECR I-03813. | 2006 | EU | Ireland | Ireland | Yes | No | 14 months |
| 2 | Interedil Srl v. Fallimento Interedil Srl: Case C-396/09, [2011] ECR I-09915 | 2011 | EU | United Kingdom | Italy | Yes | Yes | 24 months |
| 3 | Bank Handlowy w Warszawie SA v. Christianapol sp. Z o.o.: Case C-116/11 [2012] ECR I-00000 | 2012 | EU | Poland | Germany | Yes | Yes | 18 months |
| 4 | Burgo Group SpA v. Illochroma SA: Case C-327/13, [2014] ECR I-00000 | 2014 | EU | Belgium | Belgium | No | No | 14 months |
| 5 | Wiemer and Trachte GmbH Case C-396/09, [2011] ECR I-099152 | 2011 | EU | Germany | Germany | No | No | 18 months |
| 6 | Susanne Staubitz-Schreiber Case C-1/04, [2006] ECR I-00701 | 2006 | EU | Germany | Germany | Yes | Yes | 24 months |
| 7 | MG Probud Gdynia sp. Z o.o.: Case C-444/07, [2010] ECR I-00417 | 2010 | EU | Poland | Poland | No | No | 30 months |
| 8 | Rastelli Davide e C. Snc v Jean-Charles Hidoux: Case C-191/10, [2011] ECR I-000002 | 2011 | EU | Italy | Italy | Yes | No | 15 months |
| 9 | Christa Plessers v PREFACO NV and Belgische staat Case C-509/17, [2019] ECLI:EU:C:2019:424 | 2019 | EU | Belgium | Belgium | No | No | 22 months |
| 10 | Nike European Operations Netherlands BV v Sportland Oy: Case C-310/14, [2015] ECLI:EU: C:2015:6902 | 2015 | EU | Finland | Finland | No | No | 14 months |
| 11 | Bank Handlowy and Adamiak, CaseC-116/11[2013] BPIR174. | 2013 | EU | Poland | Germany | Yes | Yes | 22 months |
| 12 | European Commission v AMI Semiconductor Belgium, Case294/02 [2005] ECR I-2175. | 2005 | EU | Belgium | Belgium | No | No | 30 months |
| 13 | German Graphics Graphische Maschinen GmbH v van der Schee, Case C-292/08 [2009] ECRI-8421 | 2009 | EU | Netherlands | Netherlands | No | No | 18 months |
| 14 | Lutz v Bäuerle Case C-557/13, [2015] Bus LR 855. | 2015 | EU | Germany | Germany | No | No | 16 months |
| 15 | Nike European Operations Netherlands BV v Sportland Oy Case C-310/14 EU: C:2015: 690; [2015] Bus LR 1547; [2017] BCC 446 | 2015 | EU | Finland | Finland | No | No | 18 months |
| 16 | Nortel Networks SA v Rogeau, Case C-649/13 [2015] 2 BCLC 349 .. | 2015 | EU | France | France | No | No | 22 months |
| 17 | Schmid v Hertel, Case C-328/12, [2014] 1 WLR 633 | 2014 | EU | Germany | Germany | No | No | 20 months |
| 18 | Christopher Seagon v Deko Marty Belgium NV.Case C-339/07 [2009] ECRI-767 | 2009 | EU Belgium | Germany | Germany | Yes | No | 18 months |
| 19 | SCI Senior Home, Case C-195/15, ECLI:EU:C:2016:804 | 2016 | EU | France | France | No | No | 16 months |
| 20 | Skarb v Stephan Riel, Case C-47/18 ECLI:EU:C:2019:754 | 2019 | EU Poland | Austria | Austria | No | No | 18 months |
| 21 | Tarrago da Silveira v Massa Insolvente da Espírito Santo, Case C-250/17, [2018] IL Pr 530 | 2017 | EU | Luxembourg | Luxembourg | No | No | 24 months |
| 22 | Vinyls Italia SpA, in liquidation v Mediterranea di Navigazione SpA, Case C-54/16 EU: C:2017:433; [2018] 1 WLR 543. | 2017 | EU | Italy | Italy | No | No | 16 months |
| 23 | Wiemer & Trachte GmbH, in liquidation v Tadzher, CaseC-296/17 ECLI:EU:C:2018:902 | 2018 | EU | Germany | Germany | No | No | 14 months |
| 24 | Romania: Bucharest Court, VII Civil Section Case No. 8767/3/2019 (36638/3/2018) | 2018 | EU | Italy | Romania | Yes | No | 15 months |
| 25 | East-West Logistics LLP v Melars Group Ltd [2022] EWCA Civ 1419 | 2016 | EU | Malta | UK | Yes | No | 7-9 months |
| 26 | Irish Bank 2 Resolution Corporation Ltd v Quinn [2012] NICh 1: | 2012 | EU, Northern Ireland. | Seán Quinn, | Northern Ireland. | Yes | No | 2 months |
| 27 | MG Probud Gdynia sp. z o.o. v Finanzamt Bremen (C-444/07) | 2007 | EU, Poland | Gdynia, Poland | Poland | No | No | 24-30 months |
| 28 | NIKI Luftfahrt GmbH (2018) | 2017 | EU, Austria and Germany | Austria | Austria | Yes | No | 1 month |
| 29 | Air Berlin Insolvency (Joined Cases C-765/22 and C-772/22) | 2022 | EU, Germany | Germany | Germany, Spain | No | No | 17 months |
| 30 | Comité d’entreprise de Nortel Networks SA v. Cosme Rogeau (C‑649/13) | 2013 | UK | Francew | France | No | No | 19 months |
| 31 | Bank Handlowy w Warszawie SA v. Christianapol sp. z o.o. (Case C-116/11) | 2011 | EU | Poland | Poland | No | No | 21 months |
| 32 | Re Galapagos SA (2019) | 2019 | EU | Luxembourg | Luxembourg, Fareham, UK | Yes | No | 31 months |
|  |  |  |  |  |  |  |  |  |
| **33** | **England and Wales (UK)**  Shierson v Vlieland-Boddy: Case No. A2/2004/2614, [2005] EWCA Civ 974 | 2005 | England and Wales (UK) | UK | UK | Yes | No | Approximately 12 months |
| 34 | H & CS Holdings Pte Ltd v Glencore International AG [2019] EWHC 1459 (Ch**)** | 2019 | England and Wales (UK) | Singapore | England | No | No | 4 months |
| 35 | Re Cimolai S.p.A. and Re Luigi Cimolai Holding S.p.A. [2023] EWHC 1819 (Ch) | 2023 | England and Wales (UK) | Italy | Italy | No | No | 10 months |
| 36 | Chang Chin Fen v. Cosco Shipping (Qidong) Offshore Ltd [2021] CSOH 94 | 2021 | Scotland | Norway | Norway, Singapore | No | No | 4 months |
| 37 | Re Drax Holdings Ltd [2003] EWHC 2743 (Ch); [2004] 1 WLR 1049 | 2003 | England and Wales (UK) | England | England | No | No | 1-2 months |
| 38 | Daisytek-ISA Limited ISA [2003] 5 WLUK 491 BCC 562[2004] BPIR 30 C.L.Y. 2394 | 2003 | England and Wales (UK) | UK | UK | yes | No | Approximately 9 months |
| 39 | Re BRAC Rent- A-CAR International Inc.: Case C-No. 0042 of 2003 [2003] EWHC 128 (Ch) | 2003 | England and Wales (UK) | U.S. A | United Kingdom | Yes | Yes | Not specified |
| 40 | Re Stanford International Bank Ltd (In Receivership) [2010] EWCA Civ 137 [2010] WLR 941 | 2010 | England and Wales (UK) | Antigua and Barbuda | United States & United Kingdom | Yes | No | Not specified |
| 41 | Re Hellas Telecommunications (Luxembourg) II SCA [2009] EWHC 3199 (Ch) | 2009 | England and Wales (UK) | Luxembourg | United Kingdom | Yes | Yes | 6 Months |
| 42 | Re Nortel Networks SA and Ors [2009] EWHC 206 (Ch) | 2009 | England and Wales (UK) | France | France | Yes | Yes | 6 months |
| 43 | Collins and Aikman Europe SA, Collins and ORS, Re Insolvency Act 1986 [2006] EWHC 1343 (Ch) | 2006 | England and Wales (UK) | Luxembourg | United Kingdom | Yes | Yes | 4 months |
| 44 | Re Videology Limited: Case No; CR-2018-003870, [2018] EWHC 2186 (ch) | 2018 | England and Wales (UK) | England | United States of America | Yes | Yes | 3 months |
| 45 | Lennox Holdings PLC, RE [2008] EWHC B11 (ch). | 2008 | England and Wales (UK) | England | England | No | No | 4-6 months |
| 46 | Hans Brochier Holdings Ltd v Exn [2006] EWHC 2594 (ch) | 2006 | England and Wales (UK) | England | Germany | Yes | Yes | Approximately 2 months |
| 47 | Salvage Association, Re [2003] EWHC 1028 (Ch) | 2003 | England and Wales (UK) | England | England | No | No | Approximately 1 month |
| 48 | Re Agrokor [2017] EWHC 2971 (Ch) | 2017 | England and Wales (UK) | Croatia | Croatia | No | No | Approximately 7 months |
| 49 | Algeco Scotsman PIK SA, Re [2017] EWHC 2236 (Ch) | 2017 | England and Wales (UK) | Luxembourg | England | Yes | Yes | Approximately 6 months |
| 50 | Arm Asset Backed Securities SA (No.2), Re [2014] EWHC 1097 (Ch), [2014] 2 BCLC 364 | 2014 | England and Wales (UK) | Luxembourg | England | Yes | Yes | 12 months |
| 51 | Bluebrook, Re [2009] EWHC2114(Ch). | 2009 | England and Wales (UK) | Luxembourg | England | Yes | Yes | 4 months |
| 52 | BlueCrest Mercantile BV v Vietnam Shipbuilding Industry Group [2013] EWHC 1146. | 2013 | England and Wales (UK) | Vietnam | Vietnam | No | No | Not specified |
| 53 | Dtek Finance BV, Re [2016] EWHC 3562 (Ch), [2017] BCC 165 | 2016 | England and Wales (UK) | Netherlands | United Kingdom | Yes | Yes | 3 months |
| 54 | Gibraltar Residential Properties v Gibralcon [2010] EWHC 2595 (TCC), [2011] BLR 12. | 2010 | England and Wales (UK) | Gibraltar | Gibraltar | No | No | 4 months |
| 55 | Kaupthing Capital Partners II Master LP Inc, Re [2010] EWHC 836 (Ch); [2011] BCC 336 | 2010 | England and Wales (UK) | Guernsey | United Kingdom | Yes | Yes | 12 months |
| 56 | Magyar Telecom BV, Re [2013] EWHC 3800 (Ch), [2014] BCC 448 | 2013 | England and Wales (UK) | Netherlands | Hungary | Yes | Yes | 3 months |
| 57 | Olympic Airlines Ltd, Re [2015] UK SC 27, [2015] 1 WLR 2399 | 2015 | England and Wales (UK) | Greece | United Kingdom | Yes | No | 6 months |
| 58 | Polymer Vision v Van Dooren [2011] EWHC 2951 (Comm), [2012] ILPr 14. | 2012 | England and Wales (UK) | Netherlands | United Kingdom | Yes | No | 8 months |
| 59 | Salvage Association, Re [2003] EWHC 1028 (Ch); [2004] 1 WLR 174 | 2003 | England and Wales (UK) | United Kingdom | United Kingdom | No | No | 6 months |
| 60 | Seat Pagine Gialle SpA, Re [2012] EWHC 3686 (Ch) | 2012 | England and Wales (UK) | Italy | Italy | No | No | 3 months |
| 61 | Stanford International Bank Ltd, Re [2010] EWCA Civ 137, [2011] Ch 33 | 2010 | England and Wales (UK) | Antigua and Barbuda | Antigua and Barbuda | Yes | No | Not explicitly stated 2 |
| 62 | Stichting Shell Pensioenfonds v Krys [2014] UKPC 41 | 2014 | England and Wales (UK) | Cayman Islands | Cayman Islands | Yes | No | Not explicitly stated 2 |
| 63 | Sturgeon Central Asia Balanced Fund Ltd, Re [2020] EWHC 123 (Ch) | 2020 | England and Wales (UK) | Cayman Islands | United Kingdom | Yes | Yes | Not explicitly stated 4 |
| 64 | Van Gansewinkel Groep BV, Re [2015] EWHC 2151 | 2015 | England and Wales (UK) | Netherlands | Netherlands | No | No | Not explicitly stated 6 |
| 65 | OGX Petroleo e Gas SA, Re [2016] EWHC 25 (Ch) | 2016 | England and Wales (UK) | Brazil | Brazil | No | No | Not explicitly stated 3 |
| 66 | 19 Entertainment Ltd, Re [2016] EWHC 1545 (Ch) | 2016 | England and Wales (UK) | United Kingdom | United Kingdom | No | No | Not explicitly stated 7 |
| 67 | Chen Yung Ngai Kenneth v Li Shu Chung Ken [2021] EWHC 3346 (Ch) | 2021 | England and Wales (UK) | United Kingdom & Hong Kong | United Kingdom | Yes | Yes | 11 months |
| 68 | Cosco Bulk Carrier Co Ltd v Armada Shipping SA and Another [2011] EWHC 216 (Ch) | 2011 | England and Wales (UK) | Switzerland | Switzerland | No | No | Not specified 12 |
| 69 | Luc A. Despins (as Foreign Representative of HO Wan Kwok) v HO Wan Kwok [2023] EWHC 74 (Ch) | 2023 | England and Wales (UK) | United States | United States | Yes | No | 5-6 months |
| 70 | Re OJSC International Bank of Azerbaijan [2018] EWCA Civ 2802 | 2018 | England and Wales (UK) | Azerbaijan | Azerbaijan | No | No | 7 months |
| 71 | Carter v Bailey and Another (Sturgeon Central Asia Balanced Fund Ltd) [2020] EWHC 123 (Ch) | 2020 | England and Wales (UK) | Cayman Islands | England | Yes | Yes | 6 months |
| 72 | H& CS Holdings Pte Ltd v Glencore International AG [2019] EWHC 1459 (Ch) | 2019 | England and Wales (UK) | Singapore | Singapore | No | No | Approximately 4 months |
| 73 | Gerevan Trading Co Ltd v Skjevesland [2002] EWHC 2898 (Ch) | 2001 | England | England | Norway | Yes | Yes | 13 months |
| 74 | Official Receiver v Eichler [2007] BPIR 1636 | 2007 | England | NA | England | Yes | Yes | 4 months |
| 75 | Re Northsea Base Investment Ltd [2015] EWHC 121 (Ch) | 2015 | England | CYPRUS | London | Yes | Yes | 3 months |
| 76 | Ocean Rig UDW Inc. (2017) | 2017 | Marshall Islands (original), UK | Shifted from the Republic of the Marshall Islands to the Cayman Islands | Cayman Islands | Yes | Yes | 8-10 months |
| 77 | Byers v Yacht Bull Corp [2010] EWHC 133 (Ch), [2010] BPIR 535 | 2010 | England and Wales (UK) | British Virgin Islands (BVI) | England | Yes | Yes | 3-4 months |
| 78 | Re Codere Finance (UK) Ltd [2015] EWHC 3778 (Ch), [2016] All ER (D) 27 (Jan) | 2015 | England and Wales (UK) | |  | | --- |  | England | | --- | | Spain | Yes | Yes | 1-2 months |
| 79 | Commerzbank AG v Liquimar Tankers Management Inc [2017] EWHC 161 (Comm); [2017] 1 Lloyd’s Rep 273 | 2017 | England and Wales (UK) | Marshall Islands | Greece | Yes | No | 3-4 months |
| 80 | Re DAP Holdings NV [2005] EWHC 2092 (Ch); [2006] BCC 48 | 2006 | England and Wales (UK) | Netherlands | England | Yes | Yes | 2-3 months |
| 81 | Discovery (Northampton) Ltd v Debenhams Retail Ltd [2019] EWHC 2441 (Ch) | 2019 | England and Wales (UK) | England | England | No | No | 1-2 months |
| 82 | Etihad Airways PJSC v Flöther [2019] EWHC 3107 (Comm) | 2018 | England and Wales (UK) | Germany | Germany | Yes | No | 12-14 months |
| 83 | Fortress Value Recovery Fund v Blue Skye Special Opportunities Fund [2013] EWHC 14 (Comm); [2013] BPIR 276 | 2013 | England and Wales (UK) | Cayman Islands | Italy | Yes | Yes | 10-12 months |
| 84 | Global Garden Products Italy SpA, Re [2016] EWHC 1884 (Ch) | 2016 | Italy | Italy | United Kingdom (London) | Yes | Yes | 2 months |
| 85 | Hibu Group Ltd and Re HY Ltd, Re [2016] EWHC 1921 (Ch) | 2016 | England and Wales (UK) | England | UK (London) | No | No | 1-2 months |
| 86 | Marann Brooks CSV Ltd, Re [2003] BCC 239 | 2003 | England and Wales (UK) | England | Ireland | Yes | Yes | 4 months |
| 87 | Meesan Investments Ltd (Royal Trust Bank v Buchler), Re [1989] BCLC 130 | 1989 | England and Wales (UK) | England | Switzerland | Yes | Yes | 6 months |
| 88 | MyTravel Group plc, Re [2004] EWHC 2741 (Ch) | 2004 | England and Wales (UK) | England | England | No | No | 2 months |
| 89 | Oakley v Ultra Vehicle Design Ltd [2005] EWHC 872 (Ch), [2005] ILPr 747 | 2005 | England and Wales (UK) | England | France | Yes | Yes | 5 months |
| 90 | Rodenstock GmbH, Re [2011] EWHC 1104 (Ch), [2011] Bus LR 1245 | 2010 | England and Wales (UK) | Germany | Germany | Yes | No | 3 months |
| 91 | Syska v Vivendi Universal SA [2009] EWCA Civ 677, [2009] 2 All ER (Comm) 891 (CA) | 2008 | England and Wales (UK) | France | France | Yes | No | 6 months |
| 92 | Telewest Communications plc, Re [2004] BCC 342 | 2004 | England and Wales (UK) | England | England | No | No | 2 months |
| **93** | **United States of America**  In re Shimmin, No. 22-10039, 2022 LEXIS 2932 (Bankr. W.D. Okla. Oct. 14, 2022) | 2022 | USA | Isle of Man, UK | Isle of Man | Yes | No | 2 months |
| 94 | In re SPhinX, Ltd., 351 B.R. 103 (Bankr. S.D.N.Y. 2006) | 2006 | Cayman Islands | Cayman Islands | United States (New York) | Yes | No | 5 months |
| 95 | In re Fairfield Sentry Ltd., 714 F.3d 137 (2d Cir. 2013) | 2012 | British Virgin Islands (BVI) | BVI | United States (New York) | Yes | No | 36 months |
| 96 | In re Serviços de Petróleo Constellation S.A., 503 B.R. 233 (Bankr. S.D.N.Y. 2013) | 2013 | Brazil | Brazil | Brazil | No | No | 2 months |
| 97 | In re OAS S.A., 533 B.R. 83 (Bankr. S.D.N.Y. 2015) | 2015 | Brazil | Brazil | Brazil | Yes | No | 5 months |
| 98 | In re Sunac China Holdings Ltd., 23-11505 (Bankr. S.D.N.Y. Jan. 30, 2024) | 2023 | Cayman Islands | Cayman Islands | Hong Kong | Yes | Yes | 4 months |
| 99 | In re Bear Stearns High-Grade Structured Credit Strategies Master Fund, Ltd., 374 B.R. 122 (Bankr. S.D.N.Y. 2007) | 2007 | United States of America | Cayman Islands | United States | Yes | No | 2 months |
| 100 | In re Zetta Jet Pte Ltd., [2019] 1SGHC 53 | 2017 | Singapore | Singapore | United States | Yes | Yes | 18-24 months |
| 101 | In re Think3 Inc., Case No. 11-11925 (Bankr. W.D. Tex. Sept. 12, 2011) | 2011 | United States of America | United States of America | United States of America, Italy | Yes | No | 6-8 months |
| 1102 | In re Vitro S.A.B. de C.V., 701 F.3d 1031 (5th Cir. 2012) | 2011 | United States of America | Mexico | Mexico | Yes | No | 18-20 months |
| 103 | In re Berau Capital Resources Pte Ltd., 540 B.R. 80 (Bankr. S.D.N.Y. 2015) | 2015 | United States of America | Singapore | Indonesia | Yes | No | 5-6 months |
| 104 | In re Octaviar Administration Pty Ltd., 511 B.R. 361 (Bankr. S.D.N.Y. 2014) | 2014 | United States of America | Australia | Australia | Yes | No | 4-6 months |
| 105 | In re Cell C Proprietary Ltd., 571 B.R. 542 (Bankr. S.D.N.Y. 2017) | 2017 | United States of America | South Africa | South Africa | No | No | 3-4 months |
| 106 | In re Kemsley, No. 12-13570, 2013 WL 1164930 (Bankr. S.D.N.Y. Mar. 22, 2013) | 2013 | United Kingdom | United Kingdom | United States | Yes | No | 7 months |
| 107 | In re Oi S.A., 578 B.R. 169 (Bankr. S.D.N.Y. 2017) | 2017 | Brazil | Netherlands | Brazil | Yes | No | 8 months |
| 108 | In re Modern Land (China) Co., Ltd., No. 22-10707 (Bankr. S.D.N.Y. 2022) | 2021 | Cayman Islands | Cayman Islands | China | Yes | Yes | 5 months |
| 109 | In re Anthony O’Reilly, No. 18-24659 (Bankr. W.D. Pa. 2019) | 2019 | Bahamas | Bahamas | France | Yes | No | 10 months |
| 110 | In re Olinda Star Ltd., 614 B.R. 28 (Bankr. S.D.N.Y. 2020) | 2020 | United States of America | BVI | Brazil | Yes | No | 6 months |
| 111 | In re Ascot Fund Ltd., 603 B.R. 271 (Bankr. S.D.N.Y. 2019) | 2019 | United States of America | Cayman Islands | Cayman Islands | Yes | No | 4-5 months |
| 112 | In re Creative Finance Ltd. (In Liquidation), 543 B.R. 498 (Bankr. S.D.N.Y. 2016) | 2015 | United States of America | Cayman Islands | United Kingdom | Yes | Yes | 7 months |
| 113 | In re Elpida Memory, Inc., 2012 WL 6090194 (Bankr. D. Del. Dec. 7, 2012) | 2012 | United States of America | Japan | Japan | No | No | 3 months |
| 114 | In re Ran, 607 F.3d 1017 (5th Cir. 2010) | 2008 | Israel | Israel | United States | Yes | Yes | 6-7 months |
| 115 | In re Petition of Ho Seok Lee as Court-Appointed Manager of Young Chang Co., Ltd, 348 B.R. 799 (Bankr. W.D. Wash. 2006) | 2006 | South korea | South korea | South korea | No | No | 8 months |
| 116 | In re Sanjel (USA) Inc., Case No. 16-50778-CAG (Bankr. W.D. Tex. Jul. 28, 2016 | 2016 | Canada | Canada | United States (Texas) | No | No | 4 months |
| 117 | In re Petroforte Brasileiro de Petroleo Ltda., 530 B.R. 503 (Bankr. S.D. Fla. 2015) | 2015 | Brazil | Brazil | Brazil | No | No | 12 months |
| 118 | In re Daebo International Shipping Co., Ltd. 543 B.R. 47 (Bankr. S.D.N.Y. 2015) | 2015 | South korea | South korea | South korea | No | No | 8 months |
| 119 | In re Rede Energia S.A., 515 B.R. 69 (Bankr. S.D.N.Y. 2014) | 2014 | Brazil | Brazil | Brazil | No | No | 7 months |
| 120 | In re Qimonda AG 462 B.R. 165 (Bankr. E.D. Va. 2011); 737 F.3d 14 (4th Cir. 2013) | 2009 | Germany | Munich, Germany | Munich, Germany | No | No | 4 years |
| 121 | In re General Motors Corp. 407 B.R. 463 (Bankr. S.D.N.Y. 2009) | 2009 | United States of America | Detroit, Michigan, USA | Detroit, Michigan, USA | No | No | 1 month |
| 122 | In re Chrysler LLC 405 B.R. 84 (Bankr. S.D.N.Y. 2009) | 2009 | United States of America | Auburn Hills, Michigan, USA | Auburn Hills, Michigan, USA | No | No | 1 month |
| 123 | In re Historic & Trophy Buildings Fund FCP-SIF, Case No. 22-11461, 2023 WL 5525044 (Bankr. S.D.N.Y. Aug. 25, 2023) | 2022 | Luxembourg | Luxembourg | Luxembourg | No | No | 10 months |
| 124 | In re Barnet 737 F.3d 238 (2d Cir. 2013) | 2012 | Australia | Queensland, Australia | Queensland, Australia | No | No | 16 months |
| 125 | In re Comair Ltd., Case No. 21 Civ. 10146, 2023 WL 171892 (S.D.N.Y. Jan. 12, 2023) | 2021 | South Africa | South Africa | South Africa | No | No | 23 months |
| *126* | *Oversight & Control Commission of Avanzit, S.A.*, 385 B.R. 525, 540 (Bankr. S.D.N.Y. 2008) | 2007 | Spain | Spain | Spain | No | No | 5-6 months |
| 127 | In re Poymanov, 580 B.R. 55 (Bankr. S.D.N.Y. 2017) | 2017 | Russia | NA | Russia | No | No | 10 months |
| 128 | Armada (Singapore) Pte Ltd. v. Shah (In re Ashapura Minechem Ltd.), 480 B.R. 129 (S.D.N.Y. 2012) | 2011 | India | India | India | Yes | No | 12 months |
| 129 | In re Tradex Swiss AG, 384 B.R. 34 (Bankr. D. Mass. 2008) | 2007 | Switzerland | Switzerland | United States | Yes | No | 4 months |
| 130 | In re Octaviar Administration Pty Ltd., 511 B.R. 361 (Bankr. S.D.N.Y. 2014) | 2012 | Australia | Australia | Australia | No | No | 22 months |
| 131 | In re Agrokor d.d., 591 B.R. 163 (Bankr. S.D.N.Y. 2018) | 2017 | Croatia | Croatia | Croatia | No | No | 6 months |
| 132 | In re Mood Media Corp., 569 B.R. 556 (Bankr. S.D.N.Y. 2017) | 2017 | Canada | Canada | Canada | Yes | No | 1 month |
| 133 | In re Suntech Power Holdings Co. Ltd., 520 B.R. 399 (Bankr. S.D.N.Y. 2014) | 2014 | Cayman Islands | Cayman Islands | China | Yes | Yes | 9 months |
| 134 | In re Basis Yield Alpha Fund (Master), 381 B.R. 37 (Bankr. S.D.N.Y. 2008) | 2007 | Cayman Islands | Cayman Islands | Australia | Yes | No | 3 months |
| 135 | In re Betcorp Ltd., 400 B.R. 266 (Bankr. D. Nev. 2009) | 2008 | Australia | Australia | Australia | Yes | No | 3 months |
| 136 | In re Cozumel Caribe, S.A. de C.V., 482 B.R. 96 (Bankr. S.D.N.Y. 2012) | 2010 | Mexico | Mexico | Mexico | No | No | 2 months |
| 137 | In re Toft, 453 B.R. 186 (Bankr. S.D.N.Y. 2011) | 2011 | Germany | Germany | Germany | No | No | 3 months |
| 138 | In re Gold & Honey, Ltd., 410 B.R. 357 (Bankr. E.D.N.Y. 2009) | 2009 | Israel | Israel | Israel | No | No | 3 months |
| 139 | In re Gerova Financial Group, Ltd., 482 B.R. 86 (Bankr. S.D.N.Y. 2012) | 2012 | Bermuda | Bermuda | Bermuda | No | No | 2 months |
| 140 | In re JSC BTA Bank, 434 B.R. 334 (Bankr. S.D.N.Y. 2010) | 2010 | Kazakhstan | Kazakhstan | Kazakhstan | No | No | 1 month |
| 141 | In re Ephedra Products Liability Litigation, 349 B.R. 333 (S.D.N.Y. 2006) | 2006 | Canada | Canada | Canada | No | No | 1 month |
| 142 | In re Grand Prix Associates Inc., Case No. 09-16545 (Bankr. D.N.J. May 18, 2009) | 2009 | British Virgin Islands (BVI)​ | British Virgin Islands (BVI)​ | British Virgin Islands (BVI)​ | No | No | 2 months |
| 143 | In re Avanti Communications Group PLC, 582 B.R. 603 (Bankr. S.D.N.Y. 2018) | 2018 | United Kingdom | United Kingdom | United Kingdom | No | No | 2 months |
| 144 | In re Millennium Global Emerging Credit Master Fund Ltd., 474 B.R. 88 (S.D.N.Y. 2012) | 2010 | Bermuda | Bermuda | United Kingdom | Yes | No | 30 months |
| 145 | In re Millard, 501 B.R. 644 (Bankr. S.D.N.Y. 2013 | 2013 | Cayman Islands | Cayman Islands | Cayman Islands | No | No | 6 months |
| 146 | In re Loy, 380 B.R. 154 (Bankr. E.D. Va. 2007) | 2007 | United Kingdom | England | England | Yes | No | 2 months |
| 147 | In re Daewoo Logistics Corp., 461 B.R. 175 (Bankr. S.D.N.Y. 2011) | 2009 | South Korea | South Korea | South Korea | No | No | 24 months |
| 148 | In re Atlas Shipping A/S, 404 B.R. 726 (Bankr. S.D.N.Y. 2009) | 2009 | Denmark​ | Denmark​ | Denmark​ | No | No | 3 months |
| 149 | In re Metcalfe & Mansfield Alternative Investments, 421 B.R. 685 (Bankr. S.D.N.Y. 2010) | 2009 | Canada | Canada | Canada | No | No | 20 months |
| **150** | **European Union (EU)[[1]](#footnote-1)**  *Re Olympic Limited S.A. (in liquidation)*, Case No. 34/2024Bear | 2024 | EU | Cyprus | Cyprus (head office); registered branch in Bulgaria | No | No | 8 MONTHS |
| 151 | Case No. 45/2020, Supreme Court of Cassation (Bulgaria) | 2020 | EU | Bulgaria | Another EU Member | No | No | 6 MONTHS |
| *152* | *Re M.R.R. – Appeal Against Refusal to Suspend Enforcement*, Case No. 15463/2019, | 2019 | EU | Bulgaria | Greece | No | No | 9 MONTHS |
| 153 | Re M.D.N. – Recognition of UK Bankruptcy Proceedings Case No. 2241/2019 | 2019 | EU | Bulgaria | United Kingdom | YES | No | 5 MONTHS |
| 154 | Wiemer & Trachte GmbH v. Zhan Oved TadzherCase No. 3609/2015 | 2015 | EU | Germany | Germany | YES | No | 4 YEARS |
| 155 | Case No. 3703/2018 | 2018 | EU | Bulgaria | Presumed outside Bulgaria | No | No | 3 MONTHS |
| 156 | Case No. 5921/2013, | 2013 | EU, Bulgaria | Another EU Member State | Same as registered office | No | No | 11 MONTHS |
| 157 | Decision No. 429/2022, Piraeus Court of Appeal (Greece), | 2020 | EU, Greece | Liberia | Greece | Yes | No | 24 months |
| 158 | Case No. 183/2021, Court of First Instance of Athens (Greece) | 2021 | EU, Greece | United States (Florida) | United States (Florida) | No | No | 12-18 months |
| 159 | Case No. 1798/2020, Court of First Instance of Piraeus (Greece), | 2020 | EU, Greece | Russia | Not clearly established (disputed) | Yes | No | pending |
| 160 | Case No. 3821/2020, Court of First Instance of Piraeus (Greece), | 2020 | EU, Greece | USA | USA | No | No | 20 months |
| *161* | *Re Bankruptcy of Greek Debtor – Shares in Cypriot Company,* Case No. 798/2020 | 2020 | EU, Greece | Greece | Greece | No | No | 18-24 months |
| *162* | *Case No. 1964/2020 (3 December 2019)* | 2019 | EU, Greece | Russia | Russia | No | No | 12-15 months |
| *163* | *Case No. 3531/2019* | 2019 | EU, Greece | Germany | Germany and Greece | No | No | 8-12 months |
| *164* | *German Trustee v. Good Faith Purchaser –* *Case No. 1367/2018* | 2018 | EU, Greece | Germany | Germany | No | No | 12-18 months |
| *165* | *Constanta Court of Appeal, 2022* | 2022 | EU, Romania | Russian Federation | Russian Federation | Yes | No | Not specified |
| *166* | *Bucharest Tribunal, 2019 – Recognition of Italian Insolvency Proceedings* | 2019 | Italy | Italy | Italy (with a branch in Romania) | Yes | No | Not specified |
| *167* | *Case No. Cpg 2/2018-3 (14 March 2018) (Agrokor).* | 2018 | EU, Slovenia | Croatia | Croatia | No | No | Not specified |
| *168* | *Case No. Cpg 375/2022 (1 March 2023).* | 2022 | EU, Slovenia | Austria | Austria | Yes | No | 12 months |
| *169* | *High Court in Ljubljana, Case No. Cpg 440/2020:* | 2020 | EU, Slovenia | Croatia | Croatia | No | No | Not specified |

**Source: Case Law on UNCITRAL Texts (CLOUT) Database**

1. https://ebrd-restructuring.com/storage/uploads/r_p_documents/15872%20EBRD%20(Factsheet%20on%20cross%20border%20insolvency)_FINAL.pdf [↑](#footnote-ref-1)
